# Supplementary material for: A simple donor–acceptor probe for the detection of Cr3+ cations
Source: Royal Society of Chemistry journal article supplement (doi:10.1039/c4ra00034j), 2014-01-01
Supplement: c4ra00034j1.pdf [file c4ra00034j1.pdf]

## Supplementary data

### 1. Figure S1

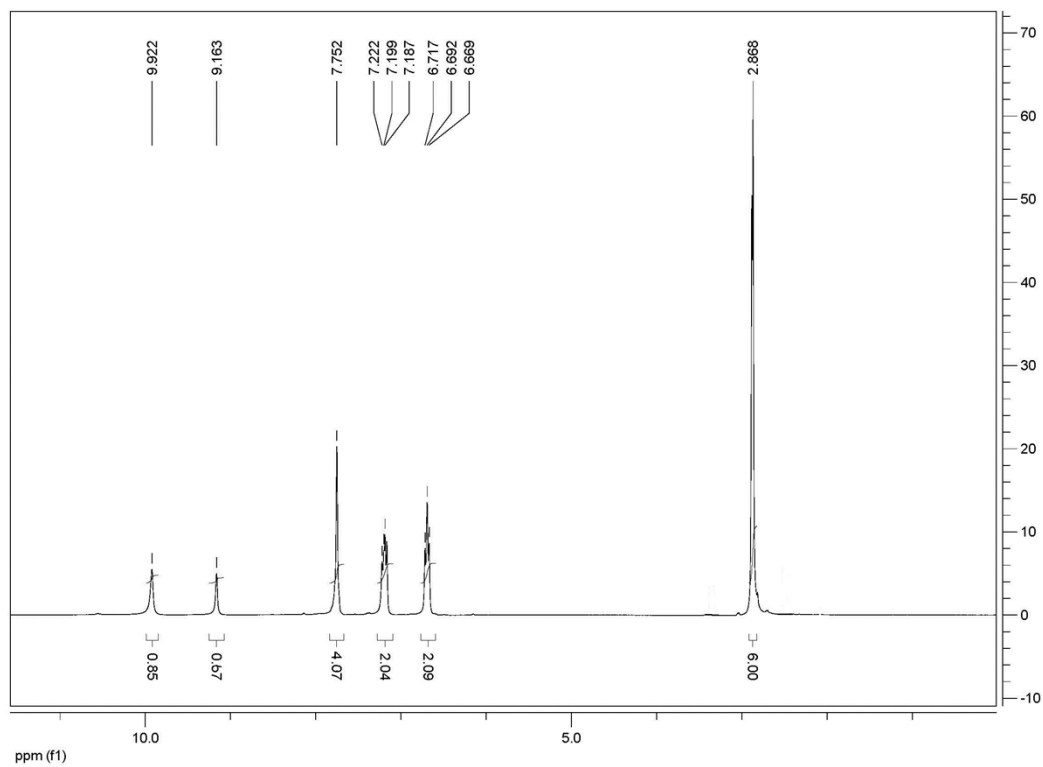

**Figure S1** The <sup>1</sup>H NMR spectra of the probe **1** (0.0033M) in TDF-*d*<sub>8</sub>

**Figure S2**

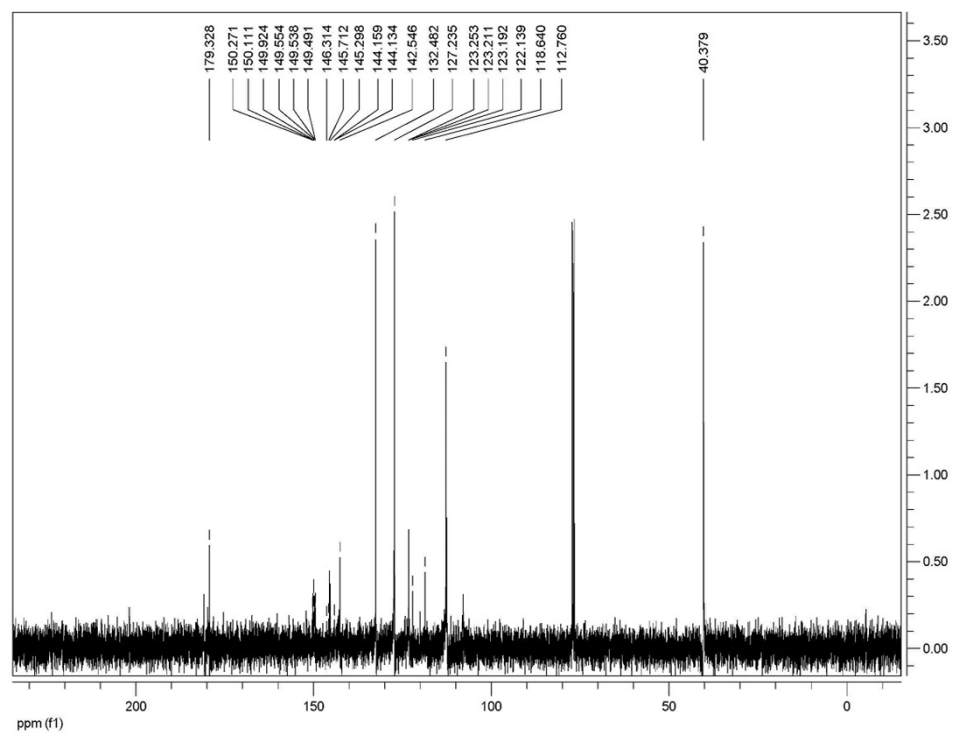

**Figure S2** The  $^{13}\text{C}$  NMR spectra of the probe **1** (0.0084M) in  $\text{TDF-}d_8$

**3. Figure S3**

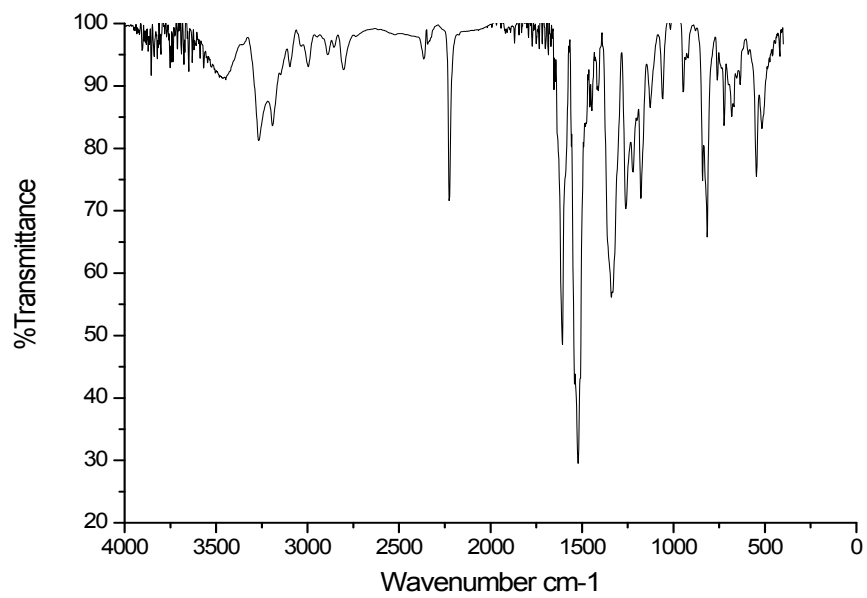

**Figure S3** The IR spectra of the probe **1**

#### 4. Figure S4

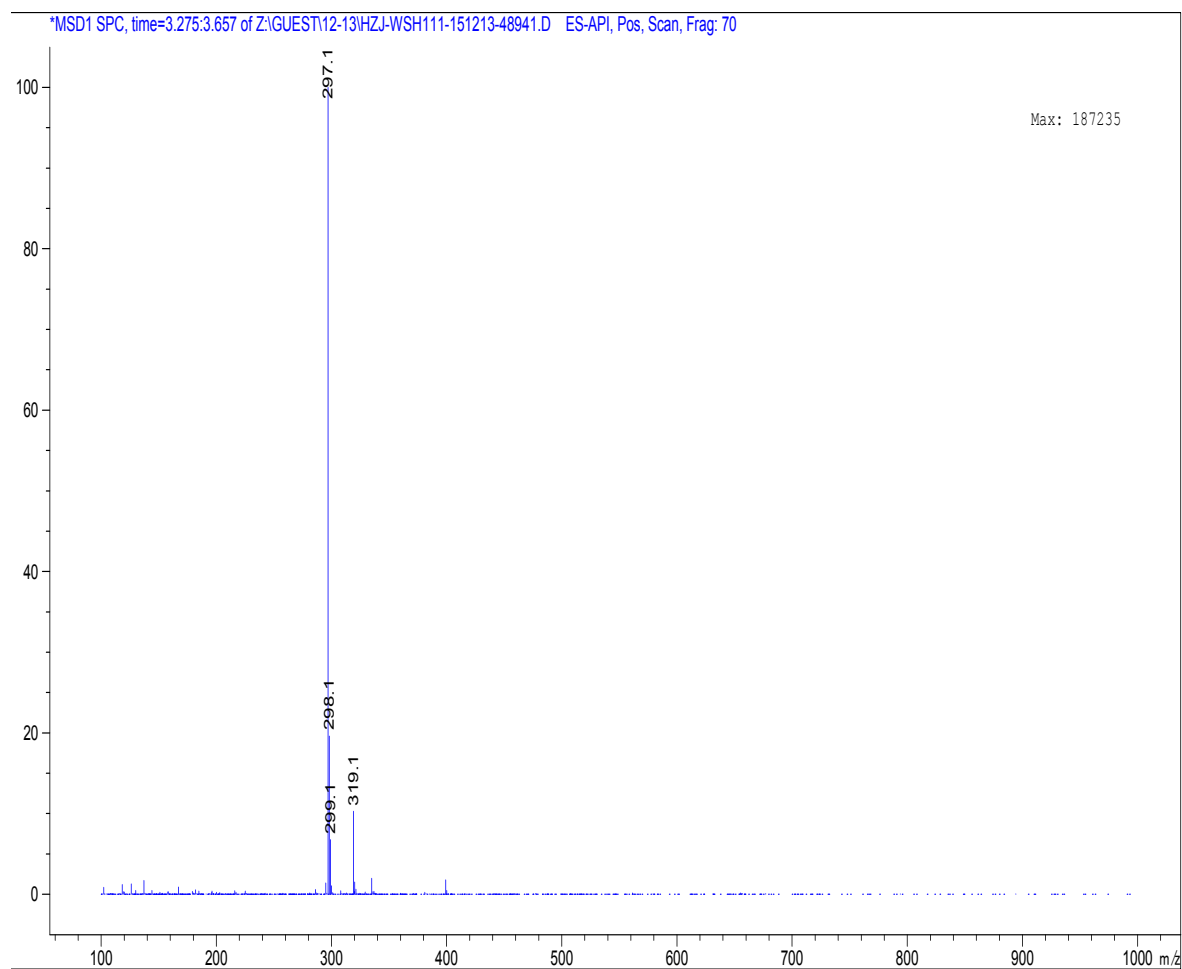

Figure S4 The MS of the probe 1

## **5. The moving visual material of living cells experiments**

The video was made by twenty photos which were taken through the time track. Through the track, the high power microscope viewing angle was unchanged. The track was lasted in three hours and twenty minutes while one photo was taken ten minutes once. The video was made in accordance with 2 fps.
